# Supplementary material
Source: PubMed Central journal article supplement (PMC4148806)
Supplement: AEM.01048-14_zam999105531so1.pdf [file AEM.01048-14_zam999105531so1.pdf]

## **Supplementary Material to**

### **The key to acetate: Metabolic fluxes of acetic acid bacteria under cocoa pulp fermentation simulating conditions**

Philipp Adler<sup>a</sup>, Lasse Jannis Frey<sup>a</sup>, Antje Berger<sup>a</sup>, Christoph Josef Bolten<sup>b</sup>, Carl Erik Hansen<sup>b</sup> and Christoph Wittmann<sup>c\*</sup>

<sup>a</sup>Institute of Biochemical Engineering, Technische Universität Braunschweig, 38106 Braunschweig, Germany

<sup>b</sup>Nestlé Research Center, Vers-Chez-Les-Blanc, 1000 Lausanne 26 Switzerland

<sup>c</sup>Institute of Systems Biotechnology, Saarland University, 66123 Saarbrücken, Germany

\*Corresponding address: Christoph Wittmann, Institute of Systems Biotechnology, Saarland University, Campus A 1.5, 66123 Saarbrücken, Germany, phone 0049-681-30271971, FAX: -30272972, christoph.wittmann@uni-saarland.de

## 1) List of reactions

**Table S1:** List of reactions and their corresponding annotated genes

| Abbreviation | Enzyme                                                         | EC Number          | Gene ( <i>Acetobacter pasteurianus</i> IFO3283-01) <sup>a</sup>                                                                                                                                 | Gene ( <i>Acetobacter pasteurianus</i> 386B) <sup>b</sup> |
|--------------|----------------------------------------------------------------|--------------------|-------------------------------------------------------------------------------------------------------------------------------------------------------------------------------------------------|-----------------------------------------------------------|
| ACO          | Aconitase                                                      | 4.2.1.3            | APA01_25120                                                                                                                                                                                     | APA386B_1323                                              |
| ALS          | $\alpha$ -Acetolactate synthase                                | 2.2.1.6            | APA01_03810,<br>APA01_03830,<br>APA01_19270                                                                                                                                                     | APA386B_835,<br>APA386B_836,<br>APA386B_1863              |
| ALDC         | $\alpha$ -Acetolactate decarboxylase                           | 4.1.1.5            | APA01_03800                                                                                                                                                                                     | APA386B_1862                                              |
| ADH1         | Alcohol dehydrogenase, membrane-associated, quinone-dependent  | 1.1.5.5            | APA01_00250<br>APA01_00860<br>APA01_00870<br>APA01_03250<br>APA01_04650<br>APA01_07070<br>APA01_08590<br>APA01_12700<br>APA01_13900<br>APA01_15620<br>APA01_22100<br>APA01_23220<br>APA01_24830 | APA386B_1948<br>APA386B_1574,<br>APA386B_1575             |
| ADH2         | Alcohol dehydrogenase (NAD(P) dependent)                       | 1.1.1.1<br>1.1.1.2 | n.a.                                                                                                                                                                                            | APA386B_1507,<br>APA386B_2362,<br>APA386B_496             |
| ALDH1        | Aldehyde dehydrogenase, membrane-associated, quinone-dependent | 1.2.99.3           | n.a.                                                                                                                                                                                            | APA386B_1211,<br>APA386B_2542,<br>APA386B_2544            |
| ALDH2        | Aldehyde dehydrogenase (NAD(P) dependent)                      | 1.2.1.3<br>1.2.1.4 | APA01_23770<br>APA01_22400<br>APA01_22090<br>APA01_20540<br>APA01_20430                                                                                                                         | APA386B_909<br>APA386B_151                                |
| CS           | Citrate synthase                                               | 2.3.3.1            | APA01-03600,<br>APA01_10670                                                                                                                                                                     | APA386B_2584                                              |
| ENO          | Enolase                                                        | 4.2.1.11           | eno                                                                                                                                                                                             | APA386B_2618                                              |
| GAPDH        | Glyceraldehyde 3-phosphate dehydrogenase                       | 1.2.1.12           | APA01_03800                                                                                                                                                                                     | APA386B_1520                                              |
| GPDH         | Glucose 6-phosphate dehydrogenase                              | 1.1.1.49           | APA01_10420,<br>APA01_06250                                                                                                                                                                     | APA386B_729                                               |
| GLPDH        | Gluconate dehydrogenase                                        | 1.1.1.44           | APA01_23130                                                                                                                                                                                     | APA386B_1154                                              |
| RuPI         | Ribulose 5-phosphate epimerase                                 | 5.1.3.1            | APA01_08750                                                                                                                                                                                     | APA386B_2378                                              |
| RPI          | Ribose 5-phosphate isomerase                                   | 5.3.1.6            | APA01_23160                                                                                                                                                                                     | APA386B_1157                                              |
| TKT1         | transketolase                                                  | 2.2.1.1            | APA01_00390,<br>APA01_23110                                                                                                                                                                     | APA386B_1152,<br>APA386B_1521                             |
| TAL          | transaldolase                                                  | 2.2.1.2            | APA01_23120                                                                                                                                                                                     | APA386B_1153                                              |
| TKT2         | transketolase                                                  | 2.2.1.1            | APA01_00390,                                                                                                                                                                                    | APA386B_1152,                                             |

|      |                                                       |                                |                                             |                                                                                                                                     |
|------|-------------------------------------------------------|--------------------------------|---------------------------------------------|-------------------------------------------------------------------------------------------------------------------------------------|
| FBP  | Fructose 1,6-bisphosphatase                           | 3.1.3.11                       | APA01_23110<br>glpX                         | APA386B_1521<br>APA386B_993                                                                                                         |
| FBA  | Fructose-bisphosphate aldolase                        | 4.1.2.13                       | APA01_02600                                 | APA386B_1752                                                                                                                        |
| ICDH | Isocitrate dehydrogenase                              | 1.1.1.42<br>1.1.1.41           | APA01_06250,<br>APA01_26420                 | APA386B_2121<br>APA386B_2558                                                                                                        |
| PC   | Pyruvate carboxylase                                  | 6.4.1.1                        | APA42C_25210                                | n.a.                                                                                                                                |
| PDC  | Pyruvate decarboxylase                                | 4.1.1.1                        | APA01_23490                                 | APA386B_1186                                                                                                                        |
| PDH  | Pyruvate dehydrogenase                                | 1.2.4.1<br>2.3.1.12            | APA01_05950                                 | APA386B_2083,<br>APA386B_2084,<br>APA386B_2737,<br>APA386B_2738,<br>APA386B_2085,<br>APA386B_2736,<br>APA386B_2735,<br>APA386B_2271 |
| ACS  | Acetyl-CoA synthetase                                 | 6.2.1.1                        | APA01_03620                                 |                                                                                                                                     |
| PHM  | Phosphohexomutase, phosphoglucomutase                 | 5.4.2.2                        | APA01_40080,<br>APA01_26780                 | APA386B_513                                                                                                                         |
| AarC | Succinyl-CoA : acetate CoA transferase                | 3.1.2.1                        | APA01_10710                                 | APA386B_2589                                                                                                                        |
| SDH  | Succinate dehydrogenase                               | 1.3.99.1                       | APA01_00320,<br>APA01_00310                 | APA386B_1513 -<br>APA386B_1516                                                                                                      |
| FH   | Fumarate hydratase                                    | 4.2.1.2                        | APA01_24940,<br>APA01_14580                 | APA386B_321,<br>APA386B_1305                                                                                                        |
| ME   | Malic Enzyme"                                         | 1.1.1.40                       | APA01_01110                                 | APA386B_1600                                                                                                                        |
| OGDC | $\alpha$ -ketoglutarate dehydrogenase                 | 1.2.4.2<br>1.8.1.4<br>2.3.1.61 | APA01_07660,<br>APA01_07670                 | APA386B_2269,<br>APA386B_2270                                                                                                       |
| MQO  | Malate dehydrogenase, malate : quinone oxidoreductase | 1.1.5.4                        | APA01_01110,<br>APA01_11550                 | APA386B_2675                                                                                                                        |
| PEPC | Phosphoenolpyruvate carboxylase                       | 4.1.1.31                       | APA01_16650 <sup>c</sup>                    | APA386B_587,<br>APA386B_588                                                                                                         |
| PGK  | Phosphoglycerate kinase                               | 2.7.2.3                        | pgk                                         | APA386B_1519                                                                                                                        |
| PGM  | Phosphoglycerate mutase                               | 5.4.2.1                        | APA01_23500,<br>APA01_25860,<br>APA01_22500 | APA386B_1895,<br>APA386B_2495                                                                                                       |
| PPDK | Pyruvate phosphate dikinase                           | 2.7.9.1                        | APA01_19100                                 | APA386B_814                                                                                                                         |
| PYK  | Pyruvate kinase                                       | 2.7.1.40                       | APA01_06160                                 | APA386B_2108                                                                                                                        |
| TPI  | Triose phosphate isomerase                            | 5.3.1.1                        | APA01_12250                                 | APA386B_2746                                                                                                                        |

<sup>a</sup>Azuma Y, Hosoyama A, Matsutani M, Furuya N, Horikawa H, Harada T, Hirakawa H, Kuhara S, Matsushita K, Fujita N, Shirai M. 2009. Whole-genome analyses reveal genetic instability of *Acetobacter pasteurianus*. *Nucleic Acids Res* 37(17):5768–5783. (Accession: [www.biocyc.org](http://www.biocyc.org))

<sup>b</sup>Illegheems K, de Vuyst L, Weckx S. 2013. Complete genome sequence and comparative analysis of *Acetobacter pasteurianus* 386B, a strain well-adapted to the cocoa bean fermentation ecosystem. *BMC Genomics* 14(1):526. (Accession: DDBJ/EMBL/GenBank, Accession Numbers: HF677570-HF677577)

<sup>c</sup>This gene is annotated with activity for 4.1.1.31 and 4.1.1.32 (phosphoenolpyruvate carboxykinase). However, there is now experimental evidence for phosphoenolpyruvate carboxykinase.

2) Cultivation profiles of *A. pasteurianus* NCC 316 and *A. ghanensis* DSM 18895 grown in cocoa pulp simulation medium

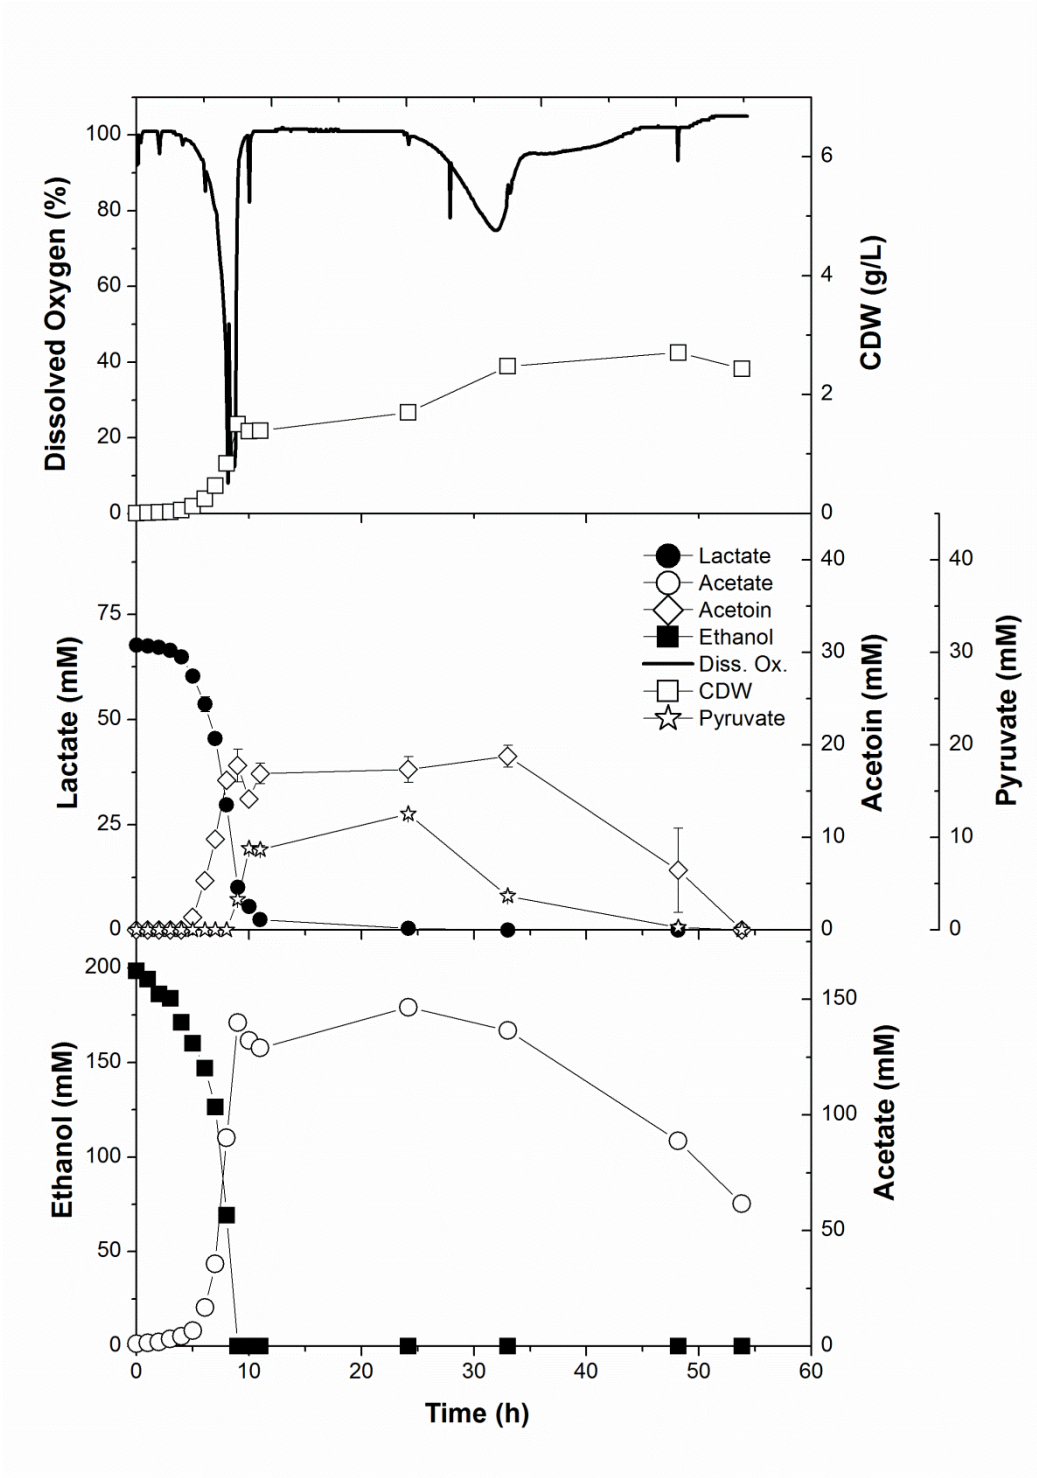

Figure S1: Cultivation profile of *A. pasteurianus* NCC 316 in cocoa pulp simulation medium.

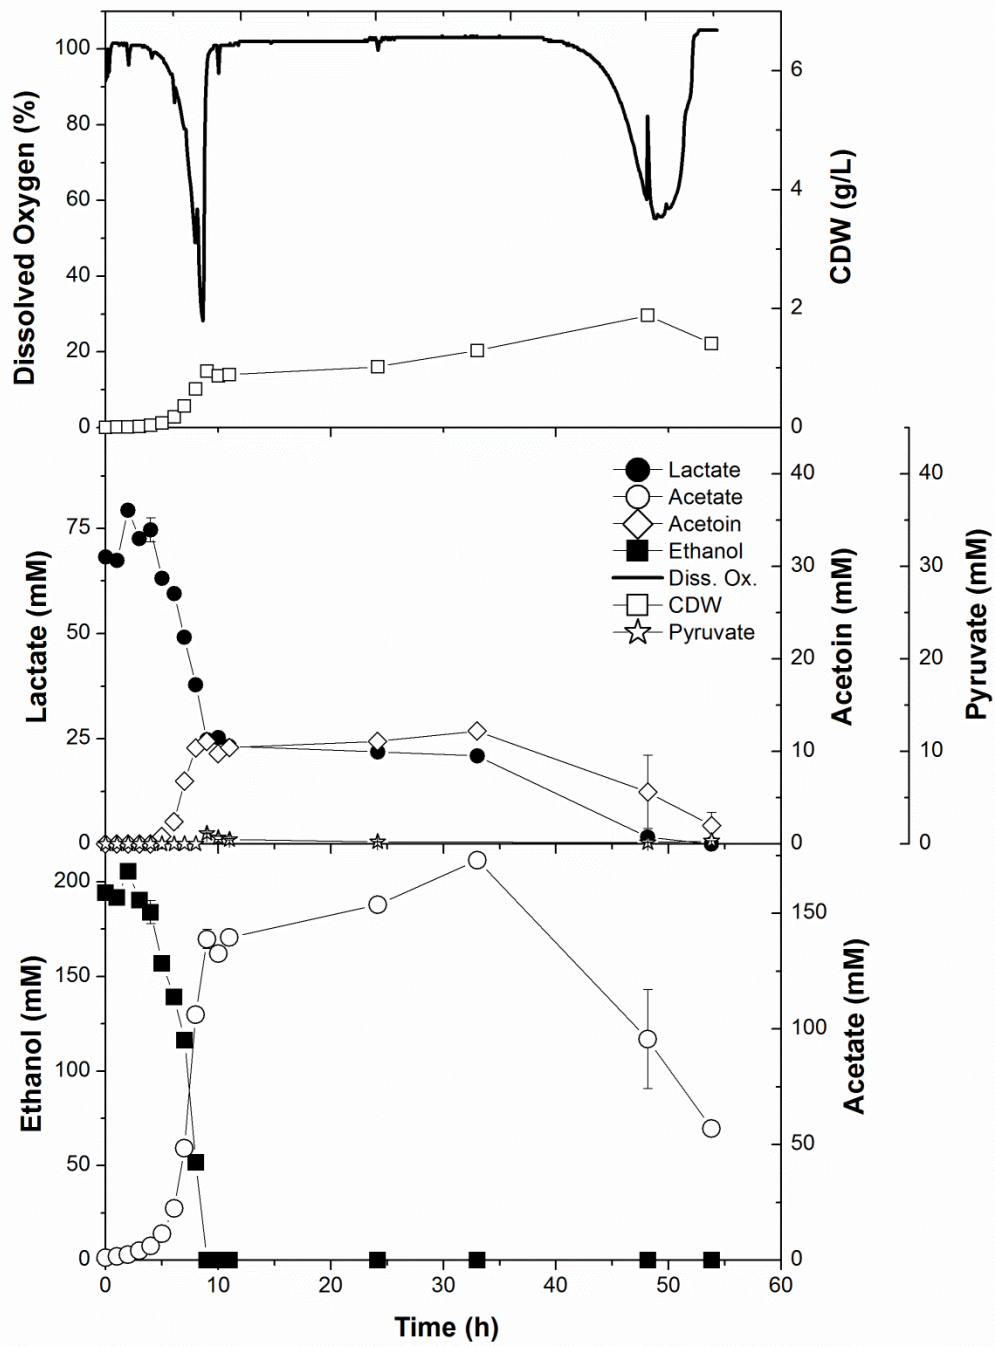

Figure S2: Cultivation profile of *A. ghanensis* DSM 18895 in cocoa pulp simulation medium.

3) Degree of *de novo* synthesis of amino acids by *A. pasteurianus* NCC 316 and *A. ghanensis* DSM 18895 grown in cocoa pulp simulation medium

**Table S2:** Mass isotopomer distributions of the carbon backbones of proteinogenic amino acids in cell pellets of *A. pasteurianus* NCC 316 and *A. ghanensis* DSM 18895 grown in cocoa pulp simulation medium with [U-<sup>13</sup>C] lactate and [U-<sup>13</sup>C] ethanol. The sum of fractional labeling, the degree of *de novo* synthesis, and the degree of amino acid uptake were derived from these mass isotopomer distributions.

| Amino acid family              | Amino acid | Mass isotopomer fraction ± standard deviation <sup>a</sup> (%) |             |             |             |             |             |             |             |             |             | Sum of fractional labeling (%) | Degree of <i>de novo</i> synthesis <sup>b</sup> (%) | Degree of amino acid uptake (%) |            |
|--------------------------------|------------|----------------------------------------------------------------|-------------|-------------|-------------|-------------|-------------|-------------|-------------|-------------|-------------|--------------------------------|-----------------------------------------------------|---------------------------------|------------|
|                                |            | <i>m</i> +0                                                    | <i>m</i> +1 | <i>m</i> +2 | <i>m</i> +3 | <i>m</i> +4 | <i>m</i> +5 | <i>m</i> +6 | <i>m</i> +7 | <i>m</i> +8 | <i>m</i> +9 |                                |                                                     |                                 |            |
| <i>A. pasteurianus</i> NCC 316 |            |                                                                |             |             |             |             |             |             |             |             |             |                                |                                                     |                                 |            |
| Pyruvate                       | Ala        | 83.4 ± 0.8                                                     | 3.8 ± 0.1   | 1.9 ± 0.1   | 10.9 ± 0.6  |             |             |             |             |             |             |                                | 13.4 ± 0.7                                          | 12.3 ± 0.7                      | 87.7 ± 0.7 |
|                                | Leu        | 86.1 ± 0.7                                                     | 6.0 ± 0.1   | 0.1 ± 0.0   | 0.8 ± 0.0   | 0.9 ± 0.0   | 6.1 ± 0.6   |             |             |             |             |                                | 8.5 ± 0.6                                           | 7.4 ± 0.6                       | 92.6 ± 0.6 |
|                                | Val        | 39.6 ± 0.1                                                     | 2.5 ± 0.0   | 3.1 ± 0.2   | 3.3 ± 0.2   | 4.3 ± 0.0   | 47.3 ± 0.3  |             |             |             |             |                                | 54.4 ± 0.5                                          | 53.3 ± 0.5                      | 46.7 ± 0.5 |
| Serine                         | Ser        | 94.8 ± 0.8                                                     | 3.4 ± 0.1   | 0.2 ± 0.2   | 1.6 ± 0.5   |             |             |             |             |             |             |                                | 2.8 ± 0.7                                           | 1.7 ± 0.7                       | 98.3 ± 0.7 |
|                                | Gly        | 95.2 ± 0.9                                                     | 3.4 ± 0.3   | 1.4 ± 0.5   |             |             |             |             |             |             |             |                                | 3.1 ± 0.7                                           | 2.0 ± 0.7                       | 98.0 ± 0.7 |
| Glutamate                      | Glu        | 64.6 ± 0.6                                                     | 4.9 ± 0.1   | 23.9 ± 1.0  | 2.4 ± 0.2   | 2.3 ± 0.4   | 1.9 ± 0.3   |             |             |             |             |                                | 15.8 ± 1.2                                          | 14.7 ± 1.2                      | 85.3 ± 1.2 |
| Aspartate                      | Asp        | 82.1 ± 3.3                                                     | 4.2 ± 0.0   | 6.6 ± 1.8   | 2.9 ± 0.8   | 4.3 ± 0.8   |             |             |             |             |             |                                | 10.8 ± 2.3                                          | 9.7 ± 2.3                       | 90.3 ± 2.3 |
|                                | Thr        | 84.8 ± 2.3                                                     | 4.1 ± 0.1   | 5.3 ± 1.2   | 2.3 ± 0.5   | 3.5 ± 0.5   |             |             |             |             |             |                                | 8.9 ± 1.5                                           | 7.8 ± 1.5                       | 92.2 ± 1.5 |
|                                | Lys        | 16.9 ± 0.3                                                     | 4.5 ± 0.1   | 32.9 ± 1.4  | 33.6 ± 1.4  | 5.3 ± 1.1   | 3.5 ± 0.8   | 3.4 ± 0.6   |             |             |             |                                | 38.3 ± 3.2                                          | 37.2 ± 3.2                      | 62.8 ± 3.2 |

|          |     |               |              |               |              |              |              |              |              |               |               |            |            |            |
|----------|-----|---------------|--------------|---------------|--------------|--------------|--------------|--------------|--------------|---------------|---------------|------------|------------|------------|
| aromatic | Ile | 62.3 ±<br>1.7 | 5.4 ±<br>0.0 | 27.6 ±<br>1.9 | 2.0 ±<br>0.0 | 1.5 ±<br>0.1 | 1.2 ±<br>0.1 |              |              |               |               | 15.7 ± 1.0 | 14.6 ± 1.0 | 85.4 ± 1.0 |
|          | Tyr | 32.8 ±<br>0.4 | 3.8 ±<br>0.2 | 0.8 ±<br>0.2  | 1.1 ±<br>0.1 | 1.4 ±<br>0.1 | 3.7 ±<br>0.7 | 8.1 ±<br>1.1 | 4.0 ±<br>0.1 | 10.5 ±<br>1.1 | 33.8 ±<br>2.7 | 55.4 ± 5.1 | 54.3 ± 5.1 | 44.6 ± 5.1 |
|          | Phe | 85.3 ±<br>0.3 | 8.4 ±<br>0.0 | 0.4 ±<br>0.1  | 0.2 ±<br>0.0 | 0.2 ±<br>0.0 | 0.5 ±<br>0.0 | 0.8 ±<br>0.1 | 0.4 ±<br>0.0 | 1.0 ±<br>0.1  | 2.9 ±<br>0.3  | 6.1 ± 0.5  | 5.0 ± 0.5  | 95.0 ± 0.5 |

*A. ghanensis* DSM 18895

|           |     |               |              |               |               |              |               |              |              |               |               |            |            |            |
|-----------|-----|---------------|--------------|---------------|---------------|--------------|---------------|--------------|--------------|---------------|---------------|------------|------------|------------|
| Pyruvate  | Ala | 83.4 ±<br>1.1 | 3.8 ±<br>0.1 | 2.1 ±<br>0.3  | 10.7 ±<br>0.8 |              |               |              |              |               |               | 13.4 ± 1.0 | 12.3 ± 1.0 | 87.7 ± 1.0 |
|           | Leu | 67.3 ±<br>1.4 | 6.4 ±<br>0.1 | 0.3 ±<br>0.0  | 2.1 ±<br>0.0  | 3.0 ±<br>0.0 | 20.8 ±<br>1.3 |              |              |               |               | 25.9 ± 1.3 | 24.8 ± 1.3 | 75.2 ± 1.3 |
|           | Val | 27.6 ±<br>2.3 | 1.8 ±<br>0.2 | 2.9 ±<br>0.2  | 3.3 ±<br>0.1  | 5.5 ±<br>0.2 | 58.8 ±<br>2.6 |              |              |               |               | 66.7 ± 2.9 | 65.6 ± 2.9 | 34.4 ± 2.9 |
| Serine    | Ser | 45.7 ±<br>3.4 | 6.9 ±<br>0.2 | 6.5 ±<br>0.3  | 40.9 ±<br>2.9 |              |               |              |              |               |               | 47.5 ± 2.9 | 46.4 ± 2.9 | 53.6 ± 2.9 |
|           | Gly | 57.0 ±<br>2.6 | 4.8 ±<br>0.2 | 38.2 ±<br>2.4 |               |              |               |              |              |               |               | 40.6 ± 2.5 | 39.5 ± 2.5 | 60.5 ± 2.5 |
| Glutamate | Glu | 45.3 ±<br>4.5 | 4.5 ±<br>0.3 | 32.1 ±<br>1.3 | 6.0 ±<br>0.8  | 7.6 ±<br>2.2 | 4.6 ±<br>3.1  |              |              |               |               | 28.0 ± 2.5 | 26.9 ± 2.5 | 73.2 ± 2.5 |
| Aspartate | Asp | 72.1 ±<br>6.4 | 4.1 ±<br>0.2 | 13.0 ±<br>1.3 | 5.9 ±<br>2.3  | 4.9 ±<br>3.1 |               |              |              |               |               | 16.9 ± 5.5 | 15.8 ± 5.5 | 84.3 ± 5.5 |
|           | Thr | 74.6 ±<br>5.7 | 4.0 ±<br>0.2 | 11.7 ±<br>1.3 | 5.3 ±<br>2.0  | 4.4 ±<br>2.7 |               |              |              |               |               | 15.2 ± 4.9 | 14.1 ± 4.9 | 85.9 ± 4.9 |
|           | Lys | 15.6 ±<br>1.3 | 4.1 ±<br>0.3 | 29.6 ±<br>1.9 | 30.4 ±<br>1.6 | 9.2 ±<br>0.9 | 6.7 ±<br>1.9  | 4.3 ±<br>2.3 |              |               |               | 41.8 ± 6.0 | 40.7 ± 6.0 | 59.3 ± 6.0 |
|           | Ile | 57.2 ±<br>1.1 | 5.4 ±<br>0.1 | 29.1 ±<br>0.0 | 3.5 ±<br>0.3  | 3.4 ±<br>0.5 | 1.5 ±<br>0.4  |              |              |               |               | 19.0 ± 1.0 | 17.9 ± 1.0 | 82.1 ± 1.0 |
| aromatic  | Tyr | 31.5 ±<br>1.4 | 3.6 ±<br>0.4 | 0.9 ±<br>0.3  | 1.3 ±<br>0.5  | 1.5 ±<br>0.4 | 4.8 ±<br>1.1  | 7.7 ±<br>1.0 | 3.8 ±<br>0.2 | 11.7 ±<br>0.7 | 33.3 ±<br>5.8 | 57.4 ± 8.4 | 56.3 ± 8.4 | 43.7 ± 8.4 |
|           | Phe | 84.7 ±<br>0.5 | 8.7 ±<br>0.1 | 0.4 ±<br>0.1  | 0.3 ±<br>0.1  | 0.3 ±<br>0.1 | 0.5 ±<br>0.1  | 0.7 ±<br>0.1 | 0.5 ±<br>0.1 | 1.0 ±<br>0.1  | 2.9 ±<br>0.4  | 6.4 ± 0.8  | 5.3 ± 0.8  | 95.8 ± 0.8 |

<sup>a</sup>Labeling pattern of proteinogenic amino acids, obtained when (<sup>13</sup>C<sub>3</sub>)lactate and [<sup>13</sup>C<sub>2</sub>]ethanol were fed. Generally, the data represent mass isotopomer distributions in the M-57 fragments, which contain the entire carbon backbone. Only in the case of leucine and isoleucine, the M-85 fragments (C<sub>2</sub>-C<sub>5</sub>) were considered.

<sup>b</sup> de novo synthesis = sum of fractional labeling – 1.1 %

#### 4) Estimation of the metabolic origin of the produced amino acids

The metabolic origin of the individual amino acids was calculated using the following equations:

$$\psi_{Lac} = \frac{SFL_{Lac}^{-1.1}}{SFL_{Lac}^{-1.1} + SFL_{Eth}^{-1.1}} \cdot 100 \quad (1)$$

$$\psi_{Lac} = \frac{SFL_{Lac}^{-1.1}}{SFL_{Lac}^{-1.1} + SFL_{Eth}^{-1.1}} \cdot 100 \quad (2)$$

$\psi_{Lac}$  Degree of synthesis from lactate

$\psi_{Eth}$  Degree of synthesis from ethanol

$SFL_{Lac}$  Sum of fractional labeling of amino acids in cells grown on [<sup>13</sup>C<sub>3</sub>] lactate and [<sup>12</sup>C<sub>2</sub>] ethanol (Table S2)

$SFL_{Eth}$  Sum of fractional labeling of amino acids in cells grown on [<sup>12</sup>C<sub>3</sub>] lactate and [<sup>13</sup>C<sub>2</sub>] ethanol (Table S3)

The mass isotopomer distributions of the amino acids and the sum of fractional labeling are listed in the Tables S1 and S2.



**Table S3:** Mass isotopomer distributions of the carbon backbones of proteinogenic amino acids in cell pellets of *A. pasteurianus* NCC 316 and *A. ghanensis* DSM 18895 grown in cocoa pulp simulation medium with [U-<sup>13</sup>C] lactate and [U-<sup>12</sup>C] ethanol. The sum of fractional labeling was derived from these mass isotopomer distributions.

| Amino acid family              | Amino acid | Mass isotopomer fraction $\pm$ standard deviation <sup>a</sup> (%) |               |                |                |               |                |               |               |                |                | Sum of fractional labeling (%) |
|--------------------------------|------------|--------------------------------------------------------------------|---------------|----------------|----------------|---------------|----------------|---------------|---------------|----------------|----------------|--------------------------------|
|                                |            | <i>m</i> +0                                                        | <i>m</i> +1   | <i>m</i> +2    | <i>m</i> +3    | <i>m</i> +4   | <i>m</i> +5    | <i>m</i> +6   | <i>m</i> +7   | <i>m</i> +8    | <i>m</i> +9    |                                |
| <i>A. pasteurianus</i> NCC 316 |            |                                                                    |               |                |                |               |                |               |               |                |                |                                |
| Pyruvate                       | Ala        | 84.5 $\pm$ 0.7                                                     | 3.4 $\pm$ 0.0 | 1.3 $\pm$ 0.1  | 10.8 $\pm$ 0.7 |               |                |               |               |                |                | 12.8 $\pm$ 0.7                 |
|                                | Leu        | 89.7 $\pm$ 0.7                                                     | 5.3 $\pm$ 0.0 | 0.5 $\pm$ 0.0  | 0.7 $\pm$ 0.0  | 4.5 $\pm$ 0.7 | 2.3 $\pm$ 0.0  |               |               |                |                | 7.6 $\pm$ 0.6                  |
|                                | Val        | 38.9 $\pm$ 0.4                                                     | 2.5 $\pm$ 0.1 | 3.1 $\pm$ 0.2  | 3.4 $\pm$ 0.2  | 4.3 $\pm$ 0.1 | 47.9 $\pm$ 0.7 |               |               |                |                | 55.0 $\pm$ 0.9                 |
| Serine                         | Ser        | 94.6 $\pm$ 1.1                                                     | 3.4 $\pm$ 0.2 | 0.3 $\pm$ 0.1  | 1.7 $\pm$ 0.7  |               |                |               |               |                |                | 3.0 $\pm$ 0.8                  |
|                                | Gly        | 95.0 $\pm$ 1.0                                                     | 3.4 $\pm$ 0.3 | 1.6 $\pm$ 0.6  |                |               |                |               |               |                |                | 3.3 $\pm$ 0.8                  |
| Glutamate                      | Glu        | 81.1 $\pm$ 0.6                                                     | 5.6 $\pm$ 0.2 | 10.5 $\pm$ 0.8 | 1.7 $\pm$ 0.2  | 0.5 $\pm$ 0.0 | 0.6 $\pm$ 0.0  |               |               |                |                | 7.4 $\pm$ 0.5                  |
| Aspartate                      | Asp        | 86.9 $\pm$ 1.8                                                     | 4.4 $\pm$ 0.3 | 3.0 $\pm$ 0.8  | 1.9 $\pm$ 0.2  | 3.7 $\pm$ 0.5 |                |               |               |                |                | 7.6 $\pm$ 1.1                  |
|                                | Thr        | 88.6 $\pm$ 1.1                                                     | 4.3 $\pm$ 0.2 | 2.5 $\pm$ 0.5  | 1.6 $\pm$ 0.1  | 3.1 $\pm$ 0.3 |                |               |               |                |                | 6.6 $\pm$ 0.7                  |
|                                | Lys        | 16.9 $\pm$ 0.5                                                     | 4.7 $\pm$ 0.2 | 34.6 $\pm$ 0.4 | 35.3 $\pm$ 0.2 | 3.4 $\pm$ 0.4 | 2.2 $\pm$ 0.3  | 2.9 $\pm$ 0.3 |               |                |                | 37.0 $\pm$ 1.1                 |
|                                | Ile        | 62.3 $\pm$ 1.8                                                     | 5.5 $\pm$ 0.0 | 28.7 $\pm$ 1.8 | 1.6 $\pm$ 0.0  | 0.9 $\pm$ 0.0 | 1.0 $\pm$ 0.0  |               |               |                |                | 15.2 $\pm$ 0.8                 |
| aromatic                       | Tyr        | 31.6 $\pm$ 1.1                                                     | 3.8 $\pm$ 0.2 | 0.8 $\pm$ 0.4  | 1.3 $\pm$ 0.6  | 1.6 $\pm$ 0.6 | 3.8 $\pm$ 1.0  | 8.2 $\pm$ 1.0 | 4.0 $\pm$ 0.3 | 10.3 $\pm$ 1.1 | 34.6 $\pm$ 4.5 | 57.4 $\pm$ 7.6                 |
|                                | Phe        | 85.2 $\pm$ 0.6                                                     | 8.3 $\pm$ 0.1 | 0.4 $\pm$ 0.1  | 0.2 $\pm$ 0.1  | 0.2 $\pm$ 0.1 | 0.5 $\pm$ 0.1  | 0.8 $\pm$ 0.2 | 0.4 $\pm$ 0.1 | 1.0 $\pm$ 0.1  | 2.9 $\pm$ 0.2  | 6.3 $\pm$ 0.6                  |

| <i>A. ghanensis</i> DSM 18895 |     |            |            |            |            |            |            |           |           |           |            |            |
|-------------------------------|-----|------------|------------|------------|------------|------------|------------|-----------|-----------|-----------|------------|------------|
| Pyruvate                      | Ala | 85.0 ± 0.7 | 3.6 ± 0.1  | 1.3 ± 0.1  | 10.1 ± 0.4 |            |            |           |           |           |            | 12.1 ± 0.5 |
|                               |     | 67.3 ± 1.2 | 4.8 ± 0.2  | 1.6 ± 0.0  | 2.2 ± 0.1  | 15.8 ± 1.6 | 8.3 ± 0.4  |           |           |           |            | 23.8 ± 1.8 |
|                               | Val | 26.7 ± 1.2 | 1.8 ± 0.1  | 3.1 ± 0.2  | 3.4 ± 0.2  | 5.3 ± 0.1  | 59.7 ± 1.5 |           |           |           |            | 67.6 ± 1.8 |
| Serine                        | Ser | 49.4 ± 1.9 | 4.6 ± 0.1  | 46.1 ± 1.8 |            |            |            |           |           |           |            | 48.6 ± 2.3 |
|                               | Gly | 56.4 ± 1.9 | 4.8 ± 0.2  | 38.8 ± 1.8 |            |            |            |           |           |           |            | 41.2 ± 1.8 |
| Glutamate                     | Glu | 71.4 ± 0.7 | 7.1 ± 0.8  | 17.0 ± 0.6 | 2.8 ± 0.5  | 1.1 ± 0.1  | 0.5 ± 0.1  |           |           |           |            | 11.3 ± 0.8 |
| Aspartate                     | Asp | 93.9 ± 2.3 | 5.8 ± 0.9  | 6.6 ± 0.6  | 1.7 ± 0.4  | 2.0 ± 0.5  |            |           |           |           |            | 8.1 ± 1.3  |
|                               | Thr | 85.1 ± 2.1 | 5.6 ± 0.7  | 5.9 ± 0.6  | 1.6 ± 0.3  | 1.9 ± 0.5  |            |           |           |           |            | 7.4 ± 1.2  |
|                               | Lys | 15.6 ± 0.4 | 4.6 ± 0.0  | 34.1 ± 0.8 | 35.4 ± 0.1 | 5.9 ± 0.5  | 2.6 ± 0.4  | 1.7 ± 0.3 |           |           |            | 47.7 ± 1.4 |
| aromatic                      | Ile | 55.8 ± 0.9 | 5.4 ± 0.0  | 33.1 ± 0.2 | 3.0 ± 0.4  | 1.8 ± 0.2  | 0.9 ± 0.2  |           |           |           |            | 18.5 ± 0.7 |
|                               |     | Tyr        | 31.5 ± 0.6 | 3.6 ± 0.1  | 0.7 ± 0.1  | 1.2 ± 0.2  | 1.4 ± 0.2  | 4.9 ± 1.1 | 8.0 ± 0.9 | 3.6 ± 0.0 | 11.7 ± 1.2 | 33.5 ± 4.0 |
|                               | Phe | 85.7 ± 0.5 | 8.4 ± 0.1  | 0.4 ± 0.0  | 0.2 ± 0.0  | 0.2 ± 0.0  | 0.4 ± 0.0  | 0.6 ± 0.0 | 0.4 ± 0.0 | 0.9 ± 0.0 | 2.6 ± 0.5  | 5.7 ± 0.6  |

<sup>a</sup>Generally, the data represent mass isotopomer distributions in the M-57 fragments, which contain the entire carbon backbone. Only in the case of leucine and isoleucine, the M-85 fragments (C<sub>2</sub>-C<sub>5</sub>) were considered.

**Table S4:** Mass isotopomer distributions of the carbon backbones of proteinogenic amino acids in cell pellets of *A. pasteurianus* NCC 316 and *A. ghanensis* DSM 18895 grown in cocoa pulp simulation medium with [U-<sup>12</sup>C] lactate and [U-<sup>13</sup>C] ethanol. The sum of fractional labeling was derived from these mass isotopomer distributions.

| Amino acid family              | Amino acid | Mass isotopomer fraction $\pm$ standard deviation <sup>a</sup> (%) |               |                |               |               |               |               |               |               |               | Sum of fractional labeling (%) |
|--------------------------------|------------|--------------------------------------------------------------------|---------------|----------------|---------------|---------------|---------------|---------------|---------------|---------------|---------------|--------------------------------|
|                                |            | <i>m</i> +0                                                        | <i>m</i> +1   | <i>m</i> +2    | <i>m</i> +3   | <i>m</i> +4   | <i>m</i> +5   | <i>m</i> +6   | <i>m</i> +7   | <i>m</i> +8   | <i>m</i> +9   |                                |
| <i>A. pasteurianus</i> NCC 316 |            |                                                                    |               |                |               |               |               |               |               |               |               |                                |
| Pyruvate                       | Ala        | 95.3 $\pm$ 0.2                                                     | 3.9 $\pm$ 0.1 | 0.7 $\pm$ 0.1  | 0.1 $\pm$ 0.0 |               |               |               |               |               |               | 1.8 $\pm$ 0.1                  |
|                                | Leu        | 89.9 $\pm$ 0.6                                                     | 9.8 $\pm$ 0.5 | 0.2 $\pm$ 0.0  | 0.0 $\pm$ 0.0 | 0.0 $\pm$ 0.0 | 0.0 $\pm$ 0.0 | 0.0 $\pm$ 0.0 |               |               |               | 2.0 $\pm$ 0.1                  |
|                                | Val        | 94.5 $\pm$ 0.0                                                     | 5.3 $\pm$ 0.0 | 0.1 $\pm$ 0.0  | 0.0 $\pm$ 0.0 | 0.0 $\pm$ 0.0 |               |               |               |               |               | 1.1 $\pm$ 0.0                  |
| Serine                         | Ser        | 97.0 $\pm$ 0.0                                                     | 3.0 $\pm$ 0.0 | 0.0 $\pm$ 0.0  | 0.0 $\pm$ 0.0 |               |               |               |               |               |               | 1.0 $\pm$ 0.0                  |
|                                | Gly        | 97.8 $\pm$ 0.0                                                     | 2.2 $\pm$ 0.0 | 0.0 $\pm$ 0.0  |               |               |               |               |               |               |               | 1.1 $\pm$ 0.0                  |
| Glutamate                      | Glu        | 74.8 $\pm$ 0.7                                                     | 5.4 $\pm$ 0.0 | 17.6 $\pm$ 0.3 | 1.3 $\pm$ 0.2 | 0.8 $\pm$ 0.2 | 0.1 $\pm$ 0.0 |               |               |               |               | 9.6 $\pm$ 0.4                  |
| Aspartate                      | Asp        | 90.7 $\pm$ 1.8                                                     | 4.4 $\pm$ 0.1 | 4.3 $\pm$ 1.3  | 0.5 $\pm$ 0.3 | 0.1 $\pm$ 0.0 |               |               |               |               |               | 3.7 $\pm$ 0.9                  |
|                                | Thr        | 91.9 $\pm$ 1.2                                                     | 4.1 $\pm$ 0.1 | 3.5 $\pm$ 0.9  | 0.4 $\pm$ 0.2 | 0.0 $\pm$ 0.0 |               |               |               |               |               | 3.2 $\pm$ 0.7                  |
|                                | Lys        | 88.9 $\pm$ 1.2                                                     | 7.2 $\pm$ 3.1 | 0.5 $\pm$ 0.2  | 0.2 $\pm$ 0.0 | 0.1 $\pm$ 0.0 | 0.1 $\pm$ 0.1 |               |               |               |               | 2.7 $\pm$ 0.5                  |
|                                | Ile        | 93.0 $\pm$ 0.3                                                     | 6.2 $\pm$ 0.1 | 0.7 $\pm$ 0.1  | 0.1 $\pm$ 0.0 | 0.0 $\pm$ 0.0 | 0.0 $\pm$ 0.0 |               |               |               |               | 1.6 $\pm$ 0.1                  |
| aromatic                       | Tyr        | 88.9 $\pm$ 1.2                                                     | 9.0 $\pm$ 0.2 | 0.8 $\pm$ 0.5  | 0.6 $\pm$ 0.5 | 0.6 $\pm$ 0.4 | 0.0 $\pm$ 0.0 | 1.7 $\pm$ 0.4                  |
|                                | Phe        | 90.6 $\pm$ 0.1                                                     | 8.9 $\pm$ 0.1 | 0.4 $\pm$ 0.1  | 0.1 $\pm$ 0.0 | 0.1 $\pm$ 0.0 | 0.0 $\pm$ 0.0 | 1.1 $\pm$ 0.1                  |

| <i>A. ghanensis</i> DSM 18895 |     |            |            |            |           |           |           |           |           |           |           |            |
|-------------------------------|-----|------------|------------|------------|-----------|-----------|-----------|-----------|-----------|-----------|-----------|------------|
| Pyruvate                      | Ala | 94.8 ± 0.7 | 4.0 ± 0.2  | 0.9 ± 0.3  | 0.3 ± 0.2 |           |           |           |           |           |           | 2.2 ± 0.5  |
|                               |     | 80.2 ± 1.1 | 18.9 ± 1.2 | 0.8 ± 0.0  | 0.1 ± 0.1 | 0.0 ± 0.0 | 0.0 ± 0.0 |           |           |           |           |            |
|                               | Val | 93.7 ± 0.3 | 5.6 ± 0.1  | 0.5 ± 0.2  | 0.1 ± 0.0 | 0.1 ± 0.0 | 0.1 ± 0.0 |           |           |           |           |            |
| Serine                        | Ser | 96.5 ± 0.0 | 3.4 ± 0.2  | 0.0 ± 0.0  | 0.1 ± 0.0 |           |           |           |           |           |           | 1.2 ± 0.1  |
|                               | Gly | 97.6 ± 0.1 | 2.3 ± 0.0  | 0.0 ± 0.0  |           |           |           |           |           |           |           | 1.2 ± 0.1  |
| Glutamate                     | Glu | 60.5 ± 6.3 | 6.3 ± 0.1  | 25.1 ± 2.0 | 4.0 ± 1.5 | 3.4 ± 1.8 | 0.8 ± 0.9 |           |           |           |           | 17.2 ± 4.0 |
| Aspartate                     | Asp | 81.2 ± 5.3 | 5.5 ± 0.4  | 9.8 ± 2.3  | 2.8 ± 1.8 | 0.7 ± 0.8 |           |           |           |           |           | 9.0 ± 3.4  |
|                               | Thr | 83.2 ± 4.5 | 5.2 ± 0.3  | 8.6 ± 2.0  | 2.4 ± 1.6 | 0.6 ± 0.7 |           |           |           |           |           | 8.0 ± 0.1  |
|                               | Lys | 77.5 ± 3.8 | 8.8 ± 1.2  | 6.9 ± 2.5  | 2.0 ± 1.1 | 0.5 ± 0.4 | 0.1 ± 0.0 | 4.2 ± 7.1 |           |           |           | 5.5 ± 1.6  |
|                               | Ile | 90.2 ± 0.5 | 7.5 ± 0.1  | 2.0 ± 0.3  | 0.3 ± 0.1 | 0.0 ± 0.0 | 0.0 ± 0.0 |           |           |           |           | 4.2 ± 0.2  |
| aromatic                      | Tyr | 68.4 ± 2.4 | 9.7 ± 0.4  | 1.2 ± 0.3  | 1.0 ± 0.3 | 1.0 ± 0.3 | 0.4 ± 0.6 | 0.3 ± 0.6 | 0.0 ± 0.0 | 0.0 ± 0.0 | 0.0 ± 0.0 | 2.6 ± 1.1  |
|                               | Phe | 90.1 ± 0.3 | 9.0 ± 0.1  | 0.5 ± 0.1  | 0.2 ± 0.1 | 0.0 ± 0.0 | 0.0 ± 0.0 | 0.0 ± 0.0 | 0.0 ± 0.0 | 0.0 ± 0.0 | 0.0 ± 0.0 | 1.3 ± 0.1  |

<sup>a</sup>Generally, the data represent mass isotopomer distributions in the M-57 fragments, which contain the entire carbon backbone. Only in the case of leucine and isoleucine, the M-85 fragments (C<sub>2</sub>-C<sub>5</sub>) were considered.

**Table S5:** Metabolic origin of amino acids during the first growth phase of *A. pasteurianus* NCC 316 and *A. ghanensis* DSM 18895 on cocoa pulp simulation medium. The amino acids are grouped according to their biosynthetic families {Stephanopoulos 1998 #347}. The relative fraction of de-novo synthesis was calculated from the sum of fractional labeling (SFL) in the respective amino acid. Therefore, experimental mass isotopomer data were corrected for the natural occurrence of isotopes in the derivatization residue and in non-carbon atoms {Yang 2009 #107}.

| Amino acid family | Amino acid | Precursors | <i>A. pasteurianus</i> NCC 316                                |                                                               | <i>A. ghanensis</i> DSM 18895                                 |                                                               |
|-------------------|------------|------------|---------------------------------------------------------------|---------------------------------------------------------------|---------------------------------------------------------------|---------------------------------------------------------------|
|                   |            |            | Degree of synthesis from lactate $\pm$ standard deviation (%) | Degree of synthesis from ethanol $\pm$ standard deviation (%) | Degree of synthesis from lactate $\pm$ standard deviation (%) | Degree of synthesis from ethanol $\pm$ standard deviation (%) |
| Pyruvate          | Ala        | Pyr        | 94 $\pm$ 1                                                    | 6 $\pm$ 1                                                     | 91 $\pm$ 3                                                    | 9 $\pm$ 3                                                     |
|                   | Leu        | Pyr, AcCoA | 87 $\pm$ 2                                                    | 13 $\pm$ 2                                                    | 89 $\pm$ 1                                                    | 11 $\pm$ 1                                                    |
|                   | Val        | Pyr        | 100                                                           | 0 <sup>a</sup>                                                | 100                                                           | 0 <sup>a</sup>                                                |
| Serine            | Ser        | 3PG        | 100                                                           | 0 <sup>a</sup>                                                | 100                                                           | 0 <sup>a</sup>                                                |
|                   | Gly        | 3PG        | 100                                                           | 0 <sup>a</sup>                                                | 100                                                           | 0 <sup>a</sup>                                                |
| Glutamate         | Glu        | aKG        | 42 $\pm$ 2                                                    | 58 $\pm$ 2                                                    | 39 $\pm$ 6                                                    | 61 $\pm$ 6                                                    |
| Aspartate         | Asp        | OAA        | 72 $\pm$ 8                                                    | 28 $\pm$ 8                                                    | 47 $\pm$ 12                                                   | 52 $\pm$ 12                                                   |
|                   | Thr        | OAA        | 72 $\pm$ 7                                                    | 28 $\pm$ 7                                                    | 48 $\pm$ 12                                                   | 52 $\pm$ 12                                                   |
|                   | Lys        | OAA, Pyr   | 96 $\pm$ 1                                                    | 4 $\pm$ 1                                                     | 89 $\pm$ 4                                                    | 11 $\pm$ 4                                                    |
|                   | Ile        | OAA, Pyr   | 100 $\pm$ 0                                                   | 0 <sup>a</sup>                                                | 92 $\pm$ 1                                                    | 8 $\pm$ 1                                                     |
| aromatic          | Tyr        | PEP, E4P   | 99 $\pm$ 2                                                    | 1 $\pm$ 2                                                     | 97 $\pm$ 1                                                    | 3 $\pm$ 2                                                     |
|                   | Phe        | PEP, E4P   | 100                                                           | 0 <sup>a</sup>                                                | 100                                                           | 0 <sup>a</sup>                                                |

## 5) Mass isotopomer distributions of selected amino acid fragments

**Table S6:** Mass isotopomer distributions (%) and the corresponding standard deviations of the carbon backbones of proteinogenic amino acids in cell pellets of *A. pasteurianus* NCC 316 and *A. ghanensis* DSM 18895 grown in cocoa pulp simulation medium with [3-<sup>13</sup>C] lactate and [U-<sup>13</sup>C] ethanol.

| Amino acid | Fragment                      | Labeled substrate            |             |             |                              |             |             |
|------------|-------------------------------|------------------------------|-------------|-------------|------------------------------|-------------|-------------|
|            |                               | [U- <sup>13</sup> C] lactate |             |             | [U- <sup>13</sup> C] ethanol |             |             |
|            |                               | <i>m</i> +0                  | <i>m</i> +1 | <i>m</i> +2 | <i>m</i> +0                  | <i>m</i> +1 | <i>m</i> +2 |
| Ala        |                               |                              |             |             |                              |             |             |
| Val        | M-57                          |                              |             |             |                              |             |             |
| Val        | M-residue ( <i>m/z</i> = 302) | 46.9 ± 0.6                   | 3.8 ± 0.0   | 49.3 ± 0.5  | 97.5 ± 0.0                   | 2.5 ± 0.0   | 0.0 ± 0.0   |
| Glu        |                               |                              |             |             |                              |             |             |
| Glu        |                               |                              |             |             |                              |             |             |
| Asp        |                               |                              |             |             |                              |             |             |
| Asp        | M-residue ( <i>m/z</i> = 302) | 90.5 ± 1.3                   | 2.8 ± 0.2   | 6.8 ± 1.0   | 94.8 ± 1.0                   | 2.6 ± 0.2   | 2.5 ± 0.8   |
| Tyr        | M-residue ( <i>m/z</i> = 302) | 38.4 ± 0.3                   | 4.2 ± 0.0   | 57.4 ± 0.3  | 97.8 ± 0.0                   | 2.2 ± 0.0   | 0.0 ± 0.0   |
| Ala        |                               |                              |             |             |                              |             |             |
| Val        | M-57                          |                              |             |             |                              |             |             |
| Val        | M-residue ( <i>m/z</i> = 302) | 33.6 ± 1.2                   | 4.2 ± 0.0   | 62.2 ± 1.2  | 97.3 ± 0.0                   | 2.7 ± 0.0   | 0.0 ± 0.0   |
| Glu        |                               |                              |             |             |                              |             |             |
| Glu        |                               |                              |             |             |                              |             |             |

|     |                           |                |               |                |                |               |               |
|-----|---------------------------|----------------|---------------|----------------|----------------|---------------|---------------|
| Asp |                           |                |               |                |                |               |               |
| Asp | M-residue ( $m/z = 302$ ) | $89.5 \pm 1.3$ | $3.8 \pm 0.5$ | $6.7 \pm 0.8$  | $90.9 \pm 1.5$ | $3.8 \pm 0.4$ | $5.4 \pm 1.1$ |
| Tyr | M-residue ( $m/z = 302$ ) | $36.9 \pm 0.9$ | $4.2 \pm 0.1$ | $58.9 \pm 0.8$ | $97.7 \pm 0.0$ | $2.2 \pm 0.0$ | $0.1 \pm 0.0$ |

---

## 6) Contribution of lactate and ethanol to the major fermentation products.

The contribution of lactate and ethanol to the formation of the final product acetate was estimated by using the following equations:

$$v_{Lac \rightarrow Ac} = \frac{SFL_{Ac(Lac)}^{-1.1}}{SFL_{Ac(Eth+Lac)}^{-1.1}} \cdot 100\% \quad (3)$$

$$v_{Eth \rightarrow Ac} = \frac{SFL_{Ac(Eth)}^{-1.1}}{SFL_{Ac(Eth+Lac)}^{-1.1}} \cdot 100\% \quad (4)$$

$$v_{Lac \rightarrow Ac} + v_{Eth \rightarrow Ac} = 100\% \quad (5)$$

|                          |                                                                                                                                     |
|--------------------------|-------------------------------------------------------------------------------------------------------------------------------------|
| $v_{Eth \rightarrow Ac}$ | Flux of ethanol into acetate.                                                                                                       |
| $v_{Lac \rightarrow Ac}$ | Flux of lactate into acetate.                                                                                                       |
| $SFL_{Ac(Lac)}$          | Sum of fractional labeling of acetate produced by cells grown on [ $^{13}C_3$ ] lactate and [ $^{12}C_2$ ] ethanol (Tables S5, S6). |
| $SFL_{Ac(Eth)}$          | Sum of fractional labeling of acetate produced by cells grown on [ $^{12}C_3$ ] lactate and [ $^{13}C_2$ ] ethanol (Tables S5, S6). |
| $SFL_{Ac(Eth)}$          | Sum of fractional labeling of acetate produced by cells grown on [ $^{13}C_3$ ] lactate and [ $^{13}C_2$ ] ethanol (Tables S5, S6). |

The contribution of lactate and ethanol to the formation of the final product acetoin was calculated analogously.



**Table S7:** Experimental mass isotopomer distributions of the carbon backbones of acetate and acetoin (% of total pool  $\pm$  standard deviation) and sum of fractional labeling (SFL) in cultures of *A. pasteurianus* NCC 316 grown in cocoa pulp simulation medium

| Analyte        | Mass isotopomer fraction / SFL | Labeled substrate                                    |                           |                           |
|----------------|--------------------------------|------------------------------------------------------|---------------------------|---------------------------|
|                |                                | $^{13}\text{C}_3$ lactate, $^{13}\text{C}_2$ ethanol | $^{13}\text{C}_3$ lactate | $^{13}\text{C}_2$ ethanol |
| Acetate        | <i>m</i> +0                    | 95.5 $\pm$ 0.1                                       | 95.4 $\pm$ 0.1            | 9.4 $\pm$ 0.5             |
|                | <i>m</i> +1                    | 2.8 $\pm$ 0.0                                        | 3.7 $\pm$ 0.1             | 11.1 $\pm$ 0.1            |
|                | <i>m</i> +2                    | 1.7 $\pm$ 0.1                                        | 0.9 $\pm$ 0.0             | 79.6 $\pm$ 0.7            |
|                | (SFL)                          | 85.1 $\pm$ 0.8                                       | 2.8 $\pm$ 0.1             | 84.0 $\pm$ 0.9            |
| Acetoin (M-43) | <i>m</i> +0                    | 0.6 $\pm$ 0.2                                        | 0.3 $\pm$ 0.2             | 94.7 $\pm$ 0.5            |
|                | <i>m</i> +1                    | 0.9 $\pm$ 0.1                                        | 0.9 $\pm$ 0.1             | 4.5 $\pm$ 0.1             |
|                | <i>m</i> +2                    | 7.8 $\pm$ 0.6                                        | 8.6 $\pm$ 0.5             | 0.7 $\pm$ 0.4             |
|                | <i>m</i> +3                    | 16.1 $\pm$ 0.1                                       | 15.7 $\pm$ 0.1            | 0.0 $\pm$ 0.0             |
|                | <i>m</i> +4                    | 74.6 $\pm$ 0.4                                       | 74.4 $\pm$ 0.5            | 0.0 $\pm$ 0.0             |
|                | (SFL)                          | 89.6 $\pm$ 1.0                                       | 89.6 $\pm$ 0.9            | 1.4 8 $\pm$ 0.1           |

**Table S8:** Experimental mass isotopomer distributions of the carbon backbones of acetate and acetoin (% of total pool  $\pm$  standard deviation) and sum of fractional labeling (SFL) in cultures of *A. ghanensis* DSM 18895 grown in cocoa pulp simulation medium

| Analyte        | Mass isotopomer fraction / SFL | Labeled substrate                                    |                           |                           |
|----------------|--------------------------------|------------------------------------------------------|---------------------------|---------------------------|
|                |                                | $^{13}\text{C}_3$ lactate, $^{13}\text{C}_2$ ethanol | $^{13}\text{C}_3$ lactate | $^{13}\text{C}_2$ ethanol |
| Acetate        | <i>m</i> +0                    | 93.4 $\pm$ 0.5                                       | 93.7 $\pm$ 0.1            | 9.2 $\pm$ 0.4             |
|                | <i>m</i> +1                    | 3.1 $\pm$ 0.0                                        | 5.3 $\pm$ 0.1             | 11.0 $\pm$ 0.2            |
|                | <i>m</i> +2                    | 3.5 $\pm$ 0.4                                        | 1.0 $\pm$ 0.0             | 79.8 $\pm$ 0.6            |
|                | (SFL)                          | 85.2 $\pm$ 0.7                                       | 5.1 $\pm$ 0.5             | 82.4 $\pm$ 1.1            |
| Acetoin (M-43) | <i>m</i> +0                    | 0.6 $\pm$ 0.2                                        | 0.3 $\pm$ 0.0             | 94.7 $\pm$ 0.5            |
|                | <i>m</i> +1                    | 0.9 $\pm$ 0.1                                        | 0.9 $\pm$ 0.1             | 4.5 $\pm$ 0.1             |
|                | <i>m</i> +2                    | 7.8 $\pm$ 0.6                                        | 8.6 $\pm$ 0.5             | 0.7 $\pm$ 0.6             |
|                | <i>m</i> +3                    | 16.1 $\pm$ 0.1                                       | 15.7 $\pm$ 0.1            | 0.0 $\pm$ 0.1             |
|                | <i>m</i> +4                    | 74.6 $\pm$ 0.4                                       | 74.4 0.5                  | 0.0 $\pm$ 0.4             |
|                | (SFL)                          | 90.8 $\pm$ 0.8                                       | 90.7 $\pm$ 0.9            | 1.5 $\pm$ 0.5             |

## 7) Estimation of the labeling patterns of precursors.

The specific carbon mass isotopomer distributions of precursors was estimated from the  $^{13}\text{C}$  labeling patterns of the respective amino acid. The real mass isotopomer distribution of a proteinogenic amino acid is a linear combination of the labeling  $^{13}\text{C}$  patterns of the produced amino acid and the assimilated amino acid:

$$I_{meas} = I_{AA,prod} \cdot \psi + I_{nat} \cdot (1 - \psi)$$

|               |                                                                                              |
|---------------|----------------------------------------------------------------------------------------------|
| $\psi$        | Degree of synthesis of amino acid                                                            |
| $I_{meas}$    | Measured $^{13}\text{C}$ mass isotopomer distribution                                        |
| $I_{AA,prod}$ | $^{13}\text{C}$ mass isotopomer distribution of amino acid fragment, produced from precursor |
| $I_{nat}$     | $^{13}\text{C}$ mass isotopomer distribution of assimilated amino acid (natural labeling)    |

The  $^{13}\text{C}$  mass isotopomer distribution of the amino acid is mapped to the respective precursor:

$$I_{AA,prod} \rightarrow I_{prec}$$

|            |                                                           |
|------------|-----------------------------------------------------------|
| $I_{prec}$ | $^{13}\text{C}$ mass isotopomer distribution of precursor |
|------------|-----------------------------------------------------------|

**Table S9:** Estimated  $^{13}\text{C}$  mass isotopomer distributions (%) and corresponding standard deviations of precursors derived from proteinogenic amino acids of *A. pasteurianus* NCC 316 grown in cocoa pulp simulation medium

| Precursor (carbon atom)               | Amino acid (fragment)     | Mass isotopomer fraction | Labeled substrate           |                             |
|---------------------------------------|---------------------------|--------------------------|-----------------------------|-----------------------------|
|                                       |                           |                          | $[^{13}\text{C}_3]$ lactate | $[^{13}\text{C}_2]$ ethanol |
| OAA (C <sub>1</sub> -C <sub>2</sub> ) | Aspartate ( $m/z = 302$ ) | $m+0$                    | 21.6                        | 69.0                        |
|                                       |                           | $m+1$                    | 0.9                         | 7.1                         |
|                                       |                           | $m+2$                    | 69.5                        | 23.9                        |
| PEP (C <sub>1</sub> -C <sub>2</sub> ) | Tyrosine ( $m/z = 302$ )  | $m+0$                    | 0.0                         | 97.8                        |
|                                       |                           | $m+1$                    | 5.3                         | 2.2                         |
|                                       |                           | $m+2$                    | 94.7                        | 0.0                         |
| Pyr (C <sub>1</sub> -C <sub>2</sub> ) | Valine ( $m/z = 302$ )    | $m+0$                    | 2.1                         | 97.0                        |
|                                       |                           | $m+1$                    | 5.3                         | 2.9                         |
|                                       |                           | $m+2$                    | 92.5                        | 0.0                         |

**Table S10:** Estimated  $^{13}\text{C}$  mass isotopomer distributions (%) and corresponding standard deviations of precursors derived from proteinogenic amino acids of *A. ghanensis* DSM 18895 grown in cocoa pulp simulation medium

| Precursor (carbon atom)               | Amino acid (fragment)     | Mass isotopomer fraction | Labeled substrate           |                             |
|---------------------------------------|---------------------------|--------------------------|-----------------------------|-----------------------------|
|                                       |                           |                          | $[^{13}\text{C}_3]$ lactate | $[^{13}\text{C}_2]$ ethanol |
| OAA (C <sub>1</sub> -C <sub>2</sub> ) | Aspartate ( $m/z = 302$ ) | $m+0$                    | 44.9                        | 61.6                        |
|                                       |                           | $m+1$                    | 12.7                        | 37.4                        |
|                                       |                           | $m+2$                    | 42.4                        | 1.0                         |
| PEP (C <sub>1</sub> -C <sub>2</sub> ) | Tyrosine ( $m/z = 302$ )  | $m+0$                    | 0                           | 97.4                        |
|                                       |                           | $m+1$                    | 0.5                         | 2.4                         |
|                                       |                           | $m+2$                    | 94.7                        | 0.1                         |
| Pyr (C <sub>1</sub> -C <sub>2</sub> ) | Valine ( $m/z = 302$ )    | $m+0$                    | 0                           | 85.1                        |
|                                       |                           | $m+1$                    | 5.3                         | 4.2                         |
|                                       |                           | $m+2$                    | 94.8                        | 10.7                        |

## 8) Metabolic fluxes of *A. pasteurianus* NCC 316

The stoichiometric model that was used for flux estimation is given in Table S10. Experimental mass isotopomer data from four parallel labeling experiments were considered in the flux estimation approach.

**Table S11:** Input model for OpenFLUX. The known extracellular fluxes from Table S9 and precursor drain to biomass were normalized to the cumulative uptake flux of lactate and ethanol.

| RxnID | rxnEq                         | rxnCTrans                       | rates | rxnType | basis | deviation |
|-------|-------------------------------|---------------------------------|-------|---------|-------|-----------|
| R1    | Eth_Ex = Eth                  | ab = ab                         |       | F       | 71.96 | 0.844     |
| R2    | Lac_Ex = PyrPEP               | abc = abc                       |       | F       | 28.04 | 0.844     |
| R3    | Glu_Ex = Glu                  | abcde = abcde                   |       | F       |       |           |
| R4    | Asp_Ex = Asp                  | abcd = abcd                     |       | F       |       |           |
| R5    | Ala_Ex = Ala                  | abc = abc                       |       | F       |       |           |
| R6    | Val_Ex = Val                  | abcde = abcde                   |       | F       |       |           |
| R7    | Tyr_Ex = Tyr1                 | abcde = abcde                   |       | F       |       |           |
| R8    | GAP + DHAP = G6P              | abc + def = abcdef              |       | F       |       |           |
| R9    | GAP = DHAP                    | abc = abc                       |       | F       |       |           |
| R10   | 3PG = GAP                     | abc = abc                       |       | F       |       |           |
| R11   | PyrPEP = 3PG                  | abc = abc                       |       | F       |       |           |
| R12   | GAP + GAP + GAP = P5PE4P      | abc + def + ghi = abcdefghi     |       | F       |       |           |
| R13   | AcCoA + OAA = Icit            | ab + cdef = fedbac              |       | F       |       |           |
| R14   | Icit = AKG + CO2              | abcdef = abcde + f              |       | F       |       |           |
| R15   | AKG = 0.5 Suc + 0.5 Suc + CO2 | abcde = 0.5 abcd + 0.5 dcba + e |       | F       |       |           |
| R16   | Suc = OAA                     | abcd = abcd                     |       | F       |       |           |
| R17   | PyrPEP + CO2 = OAA            | abc + d = abcd                  |       | F       |       |           |
| R18   | PyrPEP = Ac + CO2             | abc = bc + a                    |       | F       |       |           |
| R19   | PyrPEP = AcCoA + CO2          | abc = bc + a                    |       | F       |       |           |
| R20   | PyrPEP = Acn1 + CO2           | abc = bc + a                    |       | F       |       |           |
| R21   | Acn1 + PyrPEP = Acn + CO2     | ab + cde = abde + c             |       | F       |       |           |
| R22   | CO2 = CO2_Ex                  | a = a                           |       | F       |       |           |
| R23   | Eth = Ac                      | ab = ab                         |       | F       |       |           |
| R24   | Eth = AcCoA                   | ab = ab                         |       | F       |       |           |
| R25   | Ac = Ac_Ex                    | ab = ab                         |       | F       | 63.82 | 2.341     |

|     |                              |                       |    |      |       |
|-----|------------------------------|-----------------------|----|------|-------|
| R26 | Acn = Acn_Ex                 | abcd = abcd           | F  | 9.71 | 0.900 |
| R27 | PyrPEP = PyrPEP_B            |                       | B  | 0.21 | 0.004 |
| R28 | 3PG = 3PG_B                  |                       | B  | 0.05 | 0.001 |
| R29 | P5PE4P = P5PE4P_B            |                       | B  | 0.43 | 0.008 |
| R30 | GAP = GAP_B                  |                       | B  | 0.09 | 0.002 |
| R31 | OAA = OAA_B                  |                       | B  | 0.36 | 0.007 |
| R32 | AKG = AKG_B                  |                       | B  | 0.08 | 0.001 |
| R33 | AcCoA = AcCoA_B              |                       | B  | 1.65 | 0.030 |
| R34 | G6P = G6P_B                  |                       | B  | 0.17 | 0.003 |
| R35 | PyrPEP = Ala                 | abc = abc             | F  |      |       |
| R36 | Ala = PyrPEP                 | abc = abc             | FR |      |       |
| R37 | PyrPEP + PyrPEP = Tyr1 + CO2 | abc + def = abcef + d | F  |      |       |
| R38 | PyrPEP + PyrPEP = Val + CO2  | abc + def = abefc + d | F  |      |       |
| R39 | AKG = Glu                    | abcde = abcde         | FR |      |       |
| R40 | OAA = Asp                    | abcd = abcd           | FR |      |       |
| R41 | Glu = AKG                    | abcde = abcde         | R  |      |       |
| R42 | Asp = OAA                    | abcd = abcd           | R  |      |       |
| R43 | Val = ValB                   |                       | B  | 0.27 | 0.005 |
| R44 | Asp = AspB                   |                       | B  | 0.31 | 0.006 |
| R45 | Glu = GluB                   |                       | B  | 0.34 | 0.006 |
| R46 | Tyr1 = TyrB                  |                       | B  | 0.09 | 0.002 |
| R47 | Ala = AlaB                   |                       | B  | 0.39 | 0.007 |
| R48 | Val = ValX                   | abcde = abcde         | S  |      |       |
| R49 | Asp = AspX                   | abcd = abcd           | S  |      |       |
| R50 | Glu = GluX                   | abcde = abcde         | S  |      |       |
| R51 | Ala = AlaX                   | abc = abc             | S  |      |       |
| R52 | Ac = AcX                     | ab = ab               | S  |      |       |
| R53 | Tyr1 = Tyr302X + TyrRX       | abcde = ab + cde      | S  |      |       |
| R54 | Asp = Asp302X + AspRX        | abcd = ab + cd        | S  |      |       |
| R55 | Val = Val302X + ValRX        | abcde = ab + cde      | S  |      |       |
| R56 | Glu = Glu330X + GluRX        | abcde = bcde + a      | S  |      |       |

---

**excludedMetabolites**

---

Lac\_Ex  
Eth\_Ex  
Glu\_Ex  
Asp\_Ex  
Val\_Ex

Ala\_Ex  
3PG\_B  
PyrPEP\_B  
GAP\_B  
P5PE4P\_B  
OAA\_B  
AKG\_B  
AcCoA\_B  
G6P\_B  
CO2\_Ex  
Ac\_Ex  
Acn\_Ex  
ValB  
AspB  
GluB  
AlaB  
Tyr\_Ex  
TyrB

---

**simulatedMDVs**

---

ValX#11111  
AlaX#111  
AspX#1111  
GluX#11111  
Tyr302X#11  
Glu330X#1111  
Asp302X#11  
Val302X#11  
(Ac#11)

---

**inputSubstrates**

---

Lac\_Ex  
Eth\_Ex  
Val\_Ex  
Ala\_Ex  
Asp\_Ex  
Glu\_Ex  
Tyr\_Ex

---

**RxnID = Reaction Identification, rxnCTrans = Carbon Transition, rates = Known Reaction Rates, rxnType = Reaction Type (F=irreversible, FR=forward reaction of a reversible reaction, R=backward reaction, S=excluded from the metabolite balance, B=excluded from the isotopomer balance), basis = Invariant Flux Basis, deviation = experimental error, excludedMetabolites = metabolites excluded from the balance model, simulatedMDVs =**

simulated mass isotopomer distribution vectors, inputSubstrates = compounds that are used as substrates.

**Table S12:** Experimental mass isotopomer distributions of fragments used flux estimation.

| Labeled substrate                                             | Molecule                      | Fragment                      | Mass isotopomer | Mass isotopomer fraction | Error (standard deviation) |
|---------------------------------------------------------------|-------------------------------|-------------------------------|-----------------|--------------------------|----------------------------|
| <b>[U-<sup>13</sup>C] lactate, [U-<sup>13</sup>C] ethanol</b> | Val                           | M-57                          | <i>m</i> +0     | 0.344                    | 0.001                      |
|                                                               |                               |                               | <i>m</i> +1     | 0.089                    | 0.000                      |
|                                                               |                               |                               | <i>m</i> +2     | 0.061                    | 0.002                      |
|                                                               |                               |                               | <i>m</i> +3     | 0.040                    | 0.002                      |
|                                                               |                               |                               | <i>m</i> +4     | 0.046                    | 0.000                      |
|                                                               |                               |                               | <i>m</i> +5     | 0.421                    | 0.003                      |
|                                                               | Ala                           | M-57                          | <i>m</i> +0     | 0.662                    | 0.005                      |
|                                                               | Asp                           | M-57                          | <i>m</i> +0     | 0.556                    | 0.020                      |
|                                                               |                               |                               | <i>m</i> +1     | 0.203                    | 0.006                      |
|                                                               |                               |                               | <i>m</i> +2     | 0.138                    | 0.010                      |
|                                                               | Glu                           | M-57                          | <i>m</i> +0     | 0.433                    | 0.004                      |
|                                                               |                               |                               | <i>m</i> +1     | 0.168                    | 0.001                      |
|                                                               |                               |                               | <i>m</i> +2     | 0.237                    | 0.006                      |
|                                                               | Tyr                           | M-residue ( <i>m/z</i> = 302) | <i>m</i> +0     | 0.346                    | 0.001                      |
|                                                               |                               |                               | <i>m</i> +1     | 0.119                    | 0.000                      |
|                                                               |                               |                               | <i>m</i> +2     | 0.536                    | 0.001                      |
|                                                               | Glu                           | M-159                         | <i>m</i> +0     | 0.486                    | 0.004                      |
|                                                               |                               |                               | <i>m</i> +1     | 0.149                    | 0.001                      |
|                                                               |                               |                               | <i>m</i> +2     | 0.239                    | 0.007                      |
|                                                               | Asp                           | M-residue ( <i>m/z</i> = 302) | <i>m</i> +0     | 0.670                    | 0.015                      |
|                                                               |                               |                               | <i>m</i> +1     | 0.184                    | 0.001                      |
| Val                                                           | M-residue ( <i>m/z</i> = 302) | <i>m</i> +0                   | 0.406           | 0.002                    |                            |
|                                                               |                               | <i>m</i> +1                   | 0.130           | 0.000                    |                            |
|                                                               |                               | <i>m</i> +2                   | 0.464           | 0.002                    |                            |
| <b>[U-<sup>13</sup>C] lactate</b>                             | Val                           | M-57                          | <i>m</i> +0     | 0.339                    | 0.003                      |
|                                                               |                               |                               | <i>m</i> +1     | 0.088                    | 0.001                      |
|                                                               |                               |                               | <i>m</i> +2     | 0.061                    | 0.002                      |
|                                                               |                               |                               | <i>m</i> +3     | 0.040                    | 0.002                      |
|                                                               |                               |                               | <i>m</i> +4     | 0.046                    | 0.001                      |
|                                                               |                               |                               | <i>m</i> +5     | 0.427                    | 0.007                      |
|                                                               | Ala                           | M-57                          | <i>m</i> +0     | 0.671                    | 0.005                      |
|                                                               |                               |                               | <i>m</i> +1     | 0.158                    | 0.001                      |
|                                                               | Asp                           | M-57                          | <i>m</i> +0     | 0.586                    | 0.011                      |
|                                                               |                               |                               | <i>m</i> +1     | 0.214                    | 0.001                      |
|                                                               |                               |                               | <i>m</i> +2     | 0.119                    | 0.004                      |
|                                                               | Glu                           | M-57                          | <i>m</i> +0     | 0.539                    | 0.004                      |
|                                                               |                               |                               | <i>m</i> +1     | 0.206                    | 0.002                      |
|                                                               |                               |                               | <i>m</i> +2     | 0.164                    | 0.005                      |
|                                                               | Tyr                           | M-residue ( <i>m/z</i> = 302) | <i>m</i> +0     | 0.338                    | 0.004                      |
| <i>m</i> +1                                                   |                               |                               | 0.118           | 0.000                    |                            |
| <i>m</i> +2                                                   |                               |                               | 0.544           | 0.004                    |                            |
| Glu                                                           | M-159                         | <i>m</i> +0                   | 0.607           | 0.005                    |                            |

|                                   |         |                                  |             |       |       |
|-----------------------------------|---------|----------------------------------|-------------|-------|-------|
|                                   |         |                                  | <i>m</i> +1 | 0.184 | 0.003 |
|                                   |         |                                  | <i>m</i> +2 | 0.152 | 0.005 |
|                                   | Asp     | M-residue<br>( <i>m/z</i> = 302) | <i>m</i> +0 | 0.690 | 0.008 |
|                                   |         |                                  | <i>m</i> +1 | 0.186 | 0.000 |
|                                   | Val     | M-residue<br>( <i>m/z</i> = 302) | <i>m</i> +0 | 0.402 | 0.004 |
|                                   |         |                                  | <i>m</i> +1 | 0.129 | 0.001 |
|                                   |         |                                  | <i>m</i> +2 | 0.469 | 0.005 |
|                                   | Acetate | <i>m/z</i> = 43                  | <i>m</i> +0 | 0.952 | 0.001 |
|                                   |         |                                  | <i>m</i> +1 | 0.029 | 0.000 |
|                                   | Val     | M-57                             | <i>m</i> +0 | 0.313 | 0.001 |
|                                   |         |                                  | <i>m</i> +1 | 0.144 | 0.002 |
|                                   |         |                                  | <i>m</i> +2 | 0.408 | 0.002 |
|                                   |         |                                  | <i>m</i> +3 | 0.094 | 0.000 |
|                                   |         |                                  | <i>m</i> +4 | 0.036 | 0.000 |
|                                   |         |                                  | <i>m</i> +5 | 0.006 | 0.001 |
|                                   | Ala     | M-57                             | <i>m</i> +0 | 0.660 | 0.004 |
|                                   |         |                                  | <i>m</i> +1 | 0.241 | 0.003 |
|                                   | Asp     | M-57                             | <i>m</i> +0 | 0.582 | 0.007 |
|                                   |         |                                  | <i>m</i> +1 | 0.260 | 0.004 |
|                                   |         |                                  | <i>m</i> +2 | 0.117 | 0.002 |
|                                   | Glu     | M-57                             | <i>m</i> +0 | 0.541 | 0.005 |
|                                   |         |                                  | <i>m</i> +1 | 0.279 | 0.003 |
|                                   |         |                                  | <i>m</i> +2 | 0.129 | 0.001 |
| <b>[3-<sup>13</sup>C] lactate</b> | Tyr     | M-residue<br>( <i>m/z</i> = 302) | <i>m</i> +0 | 0.733 | 0.001 |
|                                   |         |                                  | <i>m</i> +1 | 0.192 | 0.000 |
|                                   | Glu     | M-159                            | <i>m</i> +0 | 0.609 | 0.006 |
|                                   |         |                                  | <i>m</i> +1 | 0.263 | 0.004 |
|                                   |         |                                  | <i>m</i> +2 | 0.099 | 0.001 |
|                                   | Asp     | M-residue<br>( <i>m/z</i> = 302) | <i>m</i> +0 | 0.718 | 0.003 |
|                                   |         |                                  | <i>m</i> +1 | 0.205 | 0.003 |
|                                   | Val     | M-residue<br>( <i>m/z</i> = 302) | <i>m</i> +0 | 0.694 | 0.000 |
|                                   |         |                                  | <i>m</i> +1 | 0.191 | 0.000 |
|                                   |         |                                  | <i>m</i> +2 | 0.115 | 0.001 |
|                                   | Acetate | <i>m/z</i> = 43                  | <i>m</i> +0 | 0.951 | 0.001 |
|                                   |         |                                  | <i>m</i> +1 | 0.038 | 0.001 |
|                                   | Val     | M-57                             | <i>m</i> +0 | 0.729 | 0.000 |
|                                   |         |                                  | <i>m</i> +1 | 0.184 | 0.000 |
|                                   |         |                                  | <i>m</i> +2 | 0.072 | 0.000 |
|                                   |         |                                  | <i>m</i> +3 | 0.012 | 0.000 |
|                                   |         |                                  | <i>m</i> +4 | 0.002 | 0.000 |
|                                   |         |                                  | <i>m</i> +5 | 0.000 | 0.000 |
|                                   | Ala     | M-57                             | <i>m</i> +0 | 0.738 | 0.001 |
|                                   |         |                                  | <i>m</i> +1 | 0.174 | 0.001 |
|                                   | Asp     | M-57                             | <i>m</i> +0 | 0.603 | 0.011 |
|                                   |         |                                  | <i>m</i> +1 | 0.218 | 0.003 |
|                                   |         |                                  | <i>m</i> +2 | 0.130 | 0.007 |
|                                   | Glu     | M-57                             | <i>m</i> +0 | 0.497 | 0.005 |
|                                   |         |                                  | <i>m</i> +1 | 0.192 | 0.001 |
|                                   |         |                                  | <i>m</i> +2 | 0.205 | 0.002 |
|                                   | Tyr     | M-residue<br>( <i>m/z</i> = 302) | <i>m</i> +0 | 0.733 | 0.000 |
|                                   |         |                                  | <i>m</i> +1 | 0.192 | 0.000 |
|                                   | Glu     | M-159                            | <i>m</i> +2 | 0.558 | 0.005 |
|                                   |         |                                  | <i>m</i> +0 | 0.172 | 0.000 |
|                                   |         |                                  | <i>m</i> +1 | 0.194 | 0.002 |
|                                   | Asp     | M-residue                        | <i>m</i> +2 | 0.716 | 0.006 |



|     |                            | $(m/z = 302)$ |       |       |
|-----|----------------------------|---------------|-------|-------|
| Val | M-residue<br>$(m/z = 302)$ | $m+0$         | 0.191 | 0.000 |
|     |                            | $m+1$         | 0.731 | 0.000 |
|     |                            | $m+0$         | 0.194 | 0.000 |
|     |                            | $m+1$         | 0.075 | 0.000 |

The simulated and experimental mass isotopomer distributions of are presented in Figure S3:

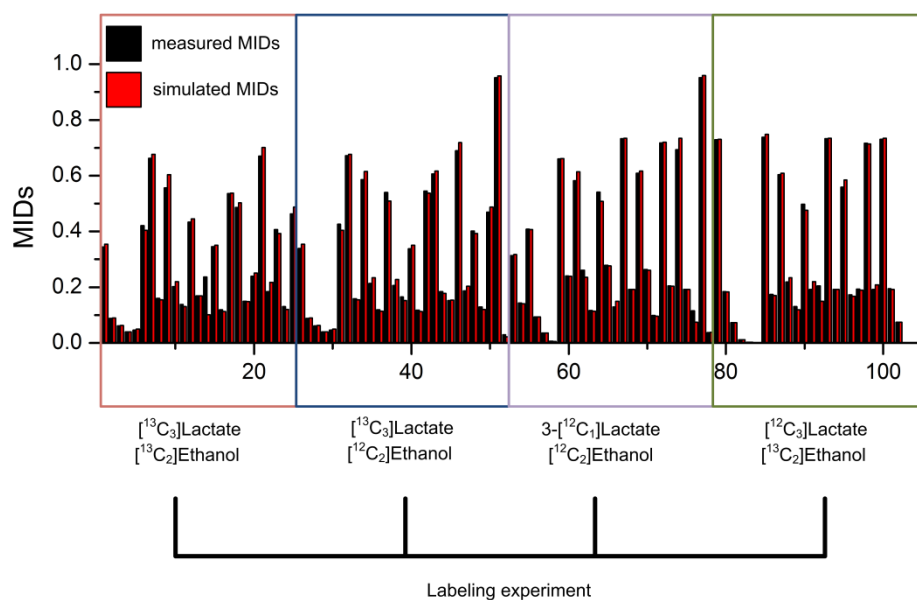

**Figure S3:** Simulated and experimental mass isotopomer distributions (MIDs).
